# Supplementary material for: Bovine leukemia virus long terminal repeat variability: identification of single nucleotide polymorphisms in regulatory sequences
Source: Virol J. 2018 Oct 25;15:165. doi: 10.1186/s12985-018-1062-z (PMC6202831; doi:10.1186/s12985-018-1062-z)
Supplement: Supplementary file 2 — LTR sequences from a total of 102 BLV field isolates used in this study, with GenBank accession numbers and geographic origin. (XLSX 14 kb) [file 12985_2018_1062_MOESM2_ESM.xlsx]

## Sheet: Arkusz1
Additional file 2. LTR sequences from a total of 102 BLV field isolates used in this study, with GenBank accession numbers and geographic origin.
No	GenBank accession no	Collection date	Geographic origin	GenBank Submission date	Genotype
1	LC080657.1	2007	Paraguay	26.11.2016	6
2	LC080658.1	2007	Paraguay	26.11.2016	6
3	MF580992.1	2016	China	03.02.2018	6
4	MF580991.1	2016	China	03.02.2018	6
5	LC154848.1	2014	Myanmar	23.11.2016	10
6	LC154849.1	2014	Myanmar	23.11.2016	10
7	MF580995.1	2016	China	03.02.2018	10
8	MF580994.1	2016	China	03.02.2018	10
9	MF580993.1	2016	China	03.02.2018	10
10	DQ288214.1	2005	Japan	14.07.2016	3
11	DQ288182.1	2005	USA	14.07.2016	3
12	DQ288183.1	_ ♪	USA	14.07.2016	3
13	AF257515.1	2000	Argentina	26.07.2016	2
14	LC080655.1	2007	Paraguay	26.11.2016	2
15	LC080654.1	2008	Peru	26.11.2016	2
16	DQ287263.1	_	Brazil	05.12.2005	2
17	FJ914764.1	1996	Argentina	24.07.2016	2
18	LC080662.1	2008	Bolivia	26.11.2016	9
19	LC080666.1	2008	Bolivia	26.11.2016	9
20	LC080663.1	2008	Bolivia	26.11.2016	9
21	LC080661.1	2008	Bolivia	26.11.2016	9
22	LC080659.1	2008	Bolivia	26.11.2016	9
23	LC080664.1	2008	Bolivia	26.11.2016	9
24	LC080667.1	2008	Bolivia	26.11.2016	9
25	LC080669.1	2008	Bolivia	26.11.2016	9
26	LC080670.1	2008	Bolivia	26.11.2016	9
27	LC080671.1	2008	Bolivia	26.11.2016	9
28	LC080672.1	2008	Bolivia	26.11.2016	9
29	LC080673.1	2008	Bolivia	26.11.2016	9
30	LC080674.1	2008	Bolivia	26.11.2016	9
31	LC080675.1	2008	Bolivia	26.11.2016	9
32	DQ288230.1	_	Belgium	14.07.2016	4
33	KT122858.1	1984	Belgium	08.09.2015	4
34	AB934282.1	2014	Japan	05.09.2014	1
35	EF600696.1	1985	USA	17.07.2007	1
36	HE967301.1	2012	Uruguay	12.12.2012	1
37	LC164084.1	_	Japan	03.02.2017	1
38	DQ288220.1	_	USA	14.07.2016	1
39	LC164085.1	_	Japan	03.02.2017	1
40	AP018029.1	_	Japan	31.03.2017	1
41	AP018007.1	_	Japan	31.03.2017	1
42	AP018018.1	_	Japan	31.03.2017	1
43	AP018027.1	_	Japan	31.03.2017	1
44	AP018012.1	_	Japan	31.03.2017	1
45	AP018013.1	_	Japan	31.03.2017	1
46	AP018030.1	_	Japan	31.03.2017	1
47	DQ288172.1	_	USA	14.07.2016	1
48	AP018016.1	_	Japan	31.03.2017	1
49	DQ288175.1	_	USA	14.07.2016	1
50	DQ288229.1	_	Costa Rica	14.07.2016	1
51	DQ288219.1	_	Costa Rica	14.07.2016	1
52	DQ288224.1	_	Costa Rica	14.07.2016	1
53	AB934283.1	2013	Japan	05.09.2014	1
54	AB934282.1	2013	Japan	05.09.2014	1
55	AP018009.1	_	Japan	31.03.2017	1
56	AP018019.1	_	Japan	31.03.2017	1
57	DQ288196.1	_	Japan	14.07.2016	1
58	DQ288195.1	_	Japan	14.07.2016	1
59	D00647.1	_	Australia	25.07.2016	1
60	K02120.1	_	Japan	26.07.2016	1
61	AP018031.1	_	Japan	31.03.2017	1
62	AP018020.1	_	Japan	31.03.2017	1
63	DQ288194.1	_	Japan	14.07.2016	1
64	DQ288197.1	_	Japan	14.07.2016	1
65	AP018022.1	_	Japan	31.03.2017	1
66	AP018023.1	_	Japan	31.03.2017	1
67	AP018021.1	_	Japan	31.03.2017	1
68	AP018032.1	_	Japan	31.03.2017	1
69	AP018015.1	_	Japan	31.03.2017	1
70	LC080653.1	2007	Paraguay	26.11.2016	1
71	AP018011.1	_	Japan	31.03.2016	1
72	HE967301.1	_	Uruguay	12.12.2012	1
73	HE967302.1	_	Uruguay	12.12.2012	1
74	HE967302.1	_	Uruguay	12.12.2012	1
75	AP018008.1	_	Japan	31.03.2017	1
76	DQ288189.1	_	Japan	14.07.2016	1
77	DQ288192.1	_	Japan	14.07.2016	1
78	LC081652.1	2007	Paraguay	26.11.2016	1
79	LC080651.1	2007	Paraguay	26.11.2016	1
80	AP018028.1	_	Japan	31.03.2017	1
81	AP018024.1	_	Japan	31.03.2017	1
82	DQ288207.1	_	Japan	14.07.2016	1
83	AP018026.1	_	Japan	31.03.2017	1
84	AP018025.1	_	Japan	31.03.2017	1
85	AP018006.1	_	Japan	31.07.2017	1
86	LC164084.1	_	Japan	03.02.2017	1
87	AP018017.1	_	Japan	31.03.2017	1
88	AP018014.1	_	Japan	31.03.2017	1
89	DQ288201.1	_	Japan	14.07.2016	1
90	AP018010.1	_	Japan	31.03.2017	1
91	AB987702.1	_	Japan	15.04.2017	1
92	DQ288199.1	_	Japan	14.07.2017	1
93	LC164086.1	_	Japan	03.02.2017	1
94	LC005616.1	_	Japan	09.04.2017	1
95	LC005615.1	_	Japan	09.04.2017	1
96	DQ288222.1	2005	Costa Rica	14.07.2016	5
97	DQ288228.1	2005	Costa Rica	14.07.2016	5
98	DQ288226.1	2005	Costa Rica	14.07.2016	5
99	DQ288227.1	2005	Costa Rica	14.07.2016	5
100	DQ288225.1	2005	Costa Rica	14.07.2016	5
101	DQ288221.1	2005	Costa Rica	14.07.2016	5
102	DQ288218.1	2005	Costa Rica	14.07.2016	5
♪- lack of the collection date in GenBank database
